# Supplementary material for: Three-dimensional deconvolution for large-angle illumination annular dark-field scanning transmission electron microscopy depth sectioning
Source: Research Square preprint supplement (doi:10.21203/rs.3.rs-8040071/v1), 2025-12-15
Supplement: Supplementary file 1 [file 2ee8471b17e3ac150628a72f.pdf]

# **Supplementary information for Three-dimensional deconvolution for large-angle illumination annular dark-field scanning transmission electron microscopy depth sectioning**

Taichi Kusumi<sup>1</sup>, Hajime Ueda<sup>1</sup>, Toshihiro Futazuka<sup>2</sup>,  
Masatoshi Hanai<sup>3</sup>, Shun Katakami<sup>1</sup>, Kazuaki Kawahara<sup>2</sup>,  
Ryo Ishikawa<sup>2\*</sup>, Naoya Shibata<sup>2</sup>, Masato Okada<sup>1\*</sup>

<sup>1</sup>Graduate School of Frontier Sciences, The University of Tokyo, 5-1-5,  
Kashiwa, 277-8561, Chiba, Japan.

<sup>2</sup>Institute of Engineering Innovation, School of Engineering, The  
University of Tokyo, 7-3-1, Bunkyo, 113-8656, Tokyo, Japan.

<sup>3</sup>Information Technology Center, The University of Tokyo, 7-3-1,  
Bunkyo, 113-8656, Tokyo, Japan.

\*Corresponding author(s). E-mail(s): [ishikawa@sigma.t.u-tokyo.ac.jp](mailto:ishikawa@sigma.t.u-tokyo.ac.jp);  
[okada@edu.k.u-tokyo.ac.jp](mailto:okada@edu.k.u-tokyo.ac.jp);

## Supplementary Note 1: Formalizing 3D deconvolution as linear regression

In this section, we formalize 3D deconvolution as linear regression. Here, we denote by  $\otimes_i$  ( $i = 1, 2, 3$ ) the 1D, 2D, and 3D convolution operators, respectively. First, we consider the 1D convolution. Since the  $n$ -th entry of the convolution of  $\mathbf{a} = [a_0, a_1, \dots, a_{M-1}]^\top \in \mathbb{R}^M$  and  $\mathbf{b} = [b_0, b_1, \dots, b_{N-1}]^\top \in \mathbb{R}^N$  is given by

$$[\mathbf{a} \otimes_1 \mathbf{b}]_n = \sum_i a_{n-i} b_i, \quad (\text{S1})$$

the convolution can be expressed as

$$\begin{aligned} \mathbf{a} \otimes_1 \mathbf{b} &= \underbrace{\begin{bmatrix} a_0 & 0 & 0 & \cdots & 0 \\ a_1 & a_0 & 0 & \cdots & 0 \\ a_2 & a_1 & a_0 & \ddots & \vdots \\ \vdots & \vdots & \vdots & \ddots & 0 \\ a_{M-1} & a_{M-2} & a_{M-3} & & a_0 \\ 0 & a_{M-1} & a_{M-2} & \ddots & \vdots \\ \vdots & \ddots & \ddots & \ddots & a_{M-3} \\ 0 & \cdots & 0 & a_{M-1} & a_{M-2} \\ 0 & \cdots & 0 & 0 & a_{M-1} \end{bmatrix}}_{\text{Toeplitz matrix}} \begin{bmatrix} b_0 \\ b_1 \\ b_2 \\ \vdots \\ b_{N-1} \end{bmatrix} \\ &=: \mathbf{T}(\mathbf{a})\mathbf{b}. \end{aligned} \quad (\text{S2})$$

Here,  $\mathbf{T}(\mathbf{a}) \in \mathbb{R}^{(M+N-1) \times N}$  denotes the Toeplitz matrix.

Next, we consider the 2D convolution. The  $(m, n)$ -th entry of the convolution of  $\mathbf{A} \in \mathbb{R}^{M_1 \times M_2}$  and  $\mathbf{B} \in \mathbb{R}^{N_1 \times N_2}$  is given by

$$\begin{aligned} [\mathbf{A} \otimes_2 \mathbf{B}]_{m,n} &= \sum_j \underbrace{\sum_i A_{m-i, n-j} B_{i,j}}_{m\text{-th entry of 1D convolution}} \\ &= \sum_j [\mathbf{a}_{n-j} \otimes_1 \mathbf{b}_j]_m \quad (\because \text{Eq. (S1)}) \\ &= \sum_j [\mathbf{T}(\mathbf{a}_{n-j})\mathbf{b}_j]_m \quad (\because \text{Eq. (S2)}) \\ &= \left[ \sum_j \mathbf{T}(\mathbf{a}_{n-j})\mathbf{b}_j \right]_m, \end{aligned} \quad (\text{S3})$$

where  $\mathbf{a}_{n-j} = [A_{0,n-j}, A_{1,n-j}, \dots, A_{M_1-1,n-j}]^\top$  and  $\mathbf{b}_i = [B_{0,j}, B_{1,j}, \dots, B_{N_1-1,j}]^\top$  are the  $(n-j)$ - and  $j$ -th column of  $\mathbf{A}$  and  $\mathbf{B}$ , respectively. Thus, the 2D convolution can be expressed as

$$\begin{aligned}
\text{vec}(\mathbf{A} \otimes_2 \mathbf{B}) &= \begin{bmatrix} \sum_j \mathbf{T}(\mathbf{a}_{0-j}) \mathbf{b}_j \\ \sum_j \mathbf{T}(\mathbf{a}_{1-j}) \mathbf{b}_j \\ \vdots \\ \sum_j \mathbf{T}(\mathbf{a}_{M_2-j}) \mathbf{b}_j \end{bmatrix} \\
&= \begin{bmatrix} \mathbf{T}(\mathbf{a}_0) & \mathbf{0} & \mathbf{0} & \cdots & \mathbf{0} \\ \mathbf{T}(\mathbf{a}_1) & \mathbf{T}(\mathbf{a}_0) & \mathbf{0} & \cdots & \mathbf{0} \\ \mathbf{T}(\mathbf{a}_2) & \mathbf{T}(\mathbf{a}_1) & \mathbf{T}(\mathbf{a}_0) & \ddots & \vdots \\ \vdots & \vdots & \vdots & \ddots & \mathbf{0} \\ \mathbf{T}(\mathbf{a}_{M_2-1}) & \mathbf{T}(\mathbf{a}_{M_2-2}) & \mathbf{T}(\mathbf{a}_{M_2-3}) & & \mathbf{T}(\mathbf{a}_0) \\ \mathbf{0} & \mathbf{T}(\mathbf{a}_{M_2-1}) & \mathbf{T}(\mathbf{a}_{M_2-2}) & \ddots & \vdots \\ \vdots & \ddots & \ddots & \ddots & \mathbf{T}(\mathbf{a}_{M_2-3}) \\ \mathbf{0} & \cdots & \mathbf{0} & \mathbf{T}(\mathbf{a}_{M_2-1}) & \mathbf{T}(\mathbf{a}_{M_2-2}) \\ \mathbf{0} & \cdots & \mathbf{0} & \mathbf{0} & \mathbf{T}(\mathbf{a}_{M_2-1}) \end{bmatrix} \begin{bmatrix} \mathbf{b}_0 \\ \mathbf{b}_1 \\ \mathbf{b}_2 \\ \vdots \\ \mathbf{b}_{N_2-1} \end{bmatrix} \\
&=: \mathbf{T}_2(\mathbf{A}) \text{vec}(\mathbf{B}),
\end{aligned} \tag{S4}$$

where  $\mathbf{T}_2(\mathbf{A}) \in \mathbb{R}^{(M_1+N_1-1)(M_2+N_2-1) \times N_1 N_2}$  denotes the doubly block Toeplitz matrix and  $\text{vec}(\cdot)$  represents the vectorization. Hence, the 2D convolution can be expressed as the matrix multiplication.

Similarly, the vectorization of 3D convolution between  $\mathcal{A} \in \mathbb{R}^{M_1 \times M_2 \times M_3}$  and  $\mathcal{B} \in \mathbb{R}^{N_1 \times N_2 \times N_3}$  is expressed as

$$\begin{aligned}
\text{vec}(\mathcal{A} \otimes_3 \mathcal{B}) &= \begin{bmatrix} \mathbf{T}_2(\mathbf{A}_0) & \mathbf{0} & \mathbf{0} & \cdots & \mathbf{0} \\ \mathbf{T}_2(\mathbf{A}_1) & \mathbf{T}_2(\mathbf{A}_0) & \mathbf{0} & \cdots & \mathbf{0} \\ \mathbf{T}_2(\mathbf{A}_2) & \mathbf{T}_2(\mathbf{A}_1) & \mathbf{T}_2(\mathbf{A}_0) & \ddots & \vdots \\ \vdots & \vdots & \vdots & \ddots & \mathbf{0} \\ \mathbf{T}_2(\mathbf{A}_{M_3-1}) & \mathbf{T}_2(\mathbf{A}_{M_3-2}) & \mathbf{T}_2(\mathbf{A}_{M_3-3}) & & \mathbf{T}_2(\mathbf{A}_0) \\ \mathbf{0} & \mathbf{T}_2(\mathbf{A}_{M_3-1}) & \mathbf{T}_2(\mathbf{A}_{M_3-2}) & \ddots & \vdots \\ \vdots & \ddots & \ddots & \ddots & \mathbf{T}_2(\mathbf{A}_{M_3-3}) \\ \mathbf{0} & \cdots & \mathbf{0} & \mathbf{T}_2(\mathbf{A}_{M_3-1}) & \mathbf{T}_2(\mathbf{A}_{M_3-2}) \\ \mathbf{0} & \cdots & \mathbf{0} & \mathbf{0} & \mathbf{T}_2(\mathbf{A}_{M_3-1}) \end{bmatrix} \begin{bmatrix} \text{vec}(\mathbf{B}_0) \\ \text{vec}(\mathbf{B}_1) \\ \text{vec}(\mathbf{B}_2) \\ \vdots \\ \text{vec}(\mathbf{B}_{N_3-1}) \end{bmatrix} \\
&=: \mathbf{T}_3(\mathcal{A}) \text{vec}(\mathcal{B}),
\end{aligned} \tag{S5}$$

where

$$\begin{aligned}
\mathbf{A}_i &= \begin{bmatrix} \mathcal{A}_{0,0,i} & \mathcal{A}_{0,1,i} & \cdots & \mathcal{A}_{0,M_2-1,i} \\ \mathcal{A}_{1,0,i} & \mathcal{A}_{1,1,i} & \cdots & \mathcal{A}_{1,M_2-1,i} \\ \vdots & \vdots & \ddots & \vdots \\ \mathcal{A}_{M_1-1,0,i} & \mathcal{A}_{M_1-1,1,i} & \cdots & \mathcal{A}_{M_1-1,M_2-1,i} \end{bmatrix} \in \mathbb{R}^{M_1 \times M_2}, \\
\mathbf{B}_i &= \begin{bmatrix} \mathcal{B}_{0,0,i} & \mathcal{B}_{0,1,i} & \cdots & \mathcal{B}_{0,N_2-1,i} \\ \mathcal{B}_{1,0,i} & \mathcal{B}_{1,1,i} & \cdots & \mathcal{B}_{1,N_2-1,i} \\ \vdots & \vdots & \ddots & \vdots \\ \mathcal{B}_{N_1-1,0,i} & \mathcal{B}_{N_1-1,1,i} & \cdots & \mathcal{B}_{N_1-1,N_2-1,i} \end{bmatrix} \in \mathbb{R}^{N_1 \times N_2}.
\end{aligned} \tag{S6}$$

Here, we model ADF-STEM depth sectioning as

$$\mathbf{I} = \mathbf{P} \otimes_3 \mathbf{O} + \mathbf{n}', \tag{S7}$$

where  $\mathbf{I}, \mathbf{O}, \mathbf{P}$  represent the intensity of an ADF-STEM depth sectioning image, an 3D object function, and a 3D probe function, respectively, and  $\mathbf{n} \sim \mathcal{N}(\mathbf{0}, \gamma^{-1} \mathbf{E})$  denotes the additive white Gaussian noise (AWGN). Using Eq. (S5), we obtain

$$\mathbf{y} = \mathbf{A} \mathbf{x} + \mathbf{n}, \tag{S8}$$

where  $\mathbf{y} = \text{vec}(\mathbf{I})$ ,  $\mathbf{A} = \mathbf{T}_3(\mathbf{P})$ ,  $\mathbf{x} = \text{vec}(\mathbf{O})$ ,  $\mathbf{n} = \text{vec}(\mathbf{n}')$ , respectively. This is equivalent to Eq. (2) in the main text. Therefore, 3D deconvolution, which recovers the 3D object function  $\mathbf{O}$  from the intensity of an ADF-STEM depth sectioning image  $\mathbf{I}$ , can be formalized as linear regression.

**Table S1** Estimated effective source size of ADF-STEM depth sectioning image of Si at various electron dose.

| Electron dose ( $\text{e}^-/\text{\AA}^2$ ) | $10^5$ | $2 \times 10^5$ | $5 \times 10^5$ | $10^6$ | $2 \times 10^6$ | $5 \times 10^6$ | $10^7$ | Infinite |
|---------------------------------------------|--------|-----------------|-----------------|--------|-----------------|-----------------|--------|----------|
| Estimated effective source size (pm)        | 59.0   | 54.5            | 52.7            | 50.0   | 42.5            | 48.6            | 48.1   | 47.3     |
